# Supplementary material for: Two new bicyclic cembranolides from a new Sarcophyton species and determination of the absolute configuration of sarcoglaucol-16-one
Source: Royal Society of Chemistry journal article supplement (doi:10.1039/b314332e), 2004-01-01
Supplement: b314332e.pdf [file b314332e.pdf]

**Supplementary data**

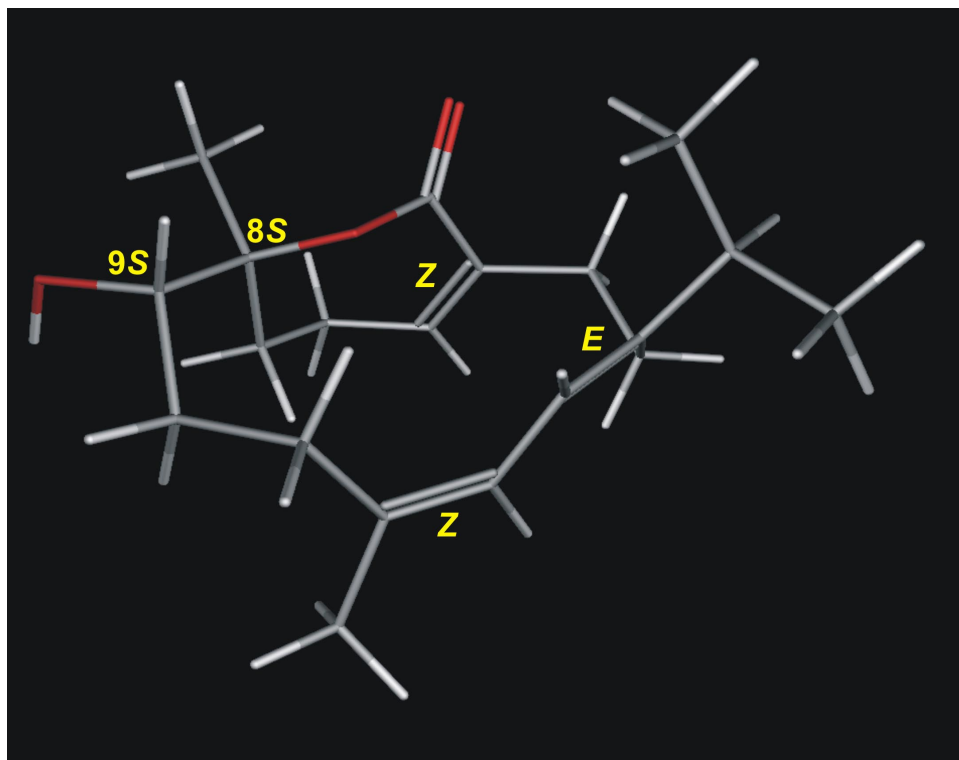

Minimum energy conformation of compound 1 shown from a different perspective than in Fig. 3.

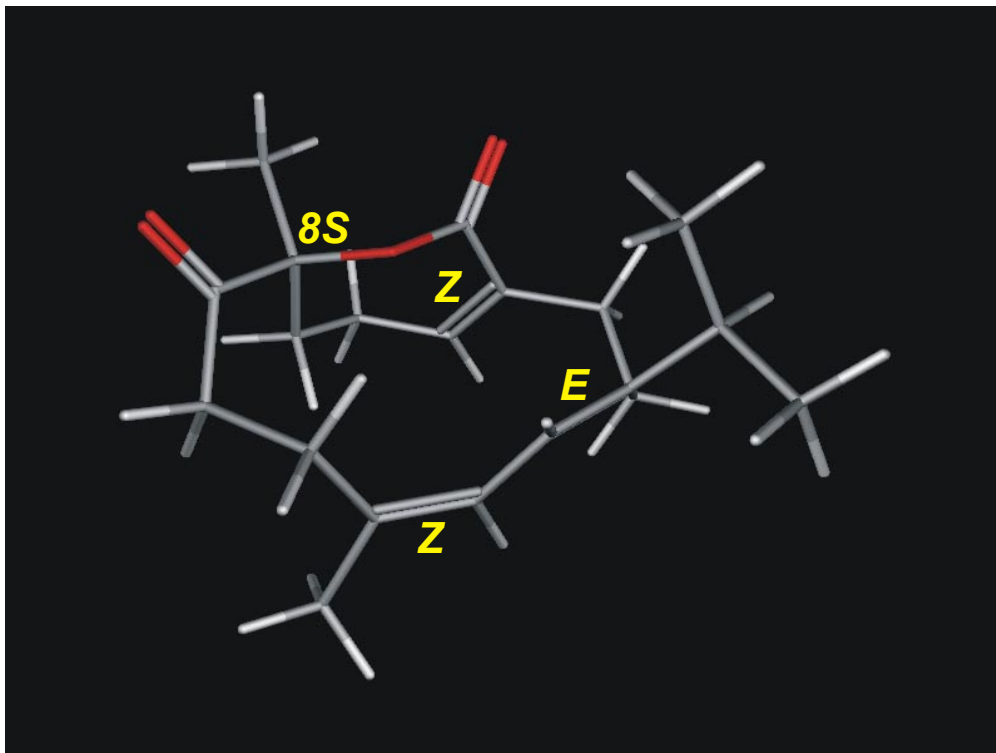

Minimum energy conformation of compound **2**
